# Supplementary material for: Dimethylsulfoniopropionate Sulfur and Methyl Carbon Assimilation in Ruegeria Species
Source: PubMed Central journal article supplement (PMC7157515; doi:10.1128/mbio.00329-20), 2020-03-24
Supplement: mBio.00329-20-st001.pdf [file mBio.00329-20-st001.pdf]

## Dimethylsulfoniopropionate sulfur and methyl carbon assimilation in *Ruegeria* species

Joseph S. Wirth, Tao Wang, Qiuyuan Huang, Robert H. White, and William B. Whitman

### Supplementary Material

**Table S1. DMSP genes in *Ruegeria pomeroyi* DSS-3 and *Ruegeria lacuscaerulensis* ITI-1157<sup>a</sup>.**

| Reaction <sup>b</sup> | Gene        | <i>R. pomeroyi</i> DSS-3  | <i>R. lacuscaerulensis</i> ITI-1157 |
|-----------------------|-------------|---------------------------|-------------------------------------|
| 1                     | <i>dddD</i> | SPO1703                   | —                                   |
| 1                     | <i>dddP</i> | SPO2299                   | SL1157_2466                         |
| 1                     | <i>dddQ</i> | SPO1596                   | SL1157_0332                         |
| 1                     | <i>dddW</i> | SPO0453                   | —                                   |
| 2                     | <i>prpE</i> | SPO2934                   | SL1157_2163                         |
| 3                     | <i>acuI</i> | SPO1914                   | SL1157_2966                         |
| 4                     | <i>dmdA</i> | SPO1913                   | SL1157_2967                         |
| 5                     | <i>dmdB</i> | SPO2045, SPO0677          | SL1157_1815, SL1157_2728            |
| 6                     | <i>dmdC</i> | SPO3804, SPO0298, SPO2915 | SL1157_0694, SL1157_2180            |
| 7                     | <i>dmdD</i> | SPO3805                   | —                                   |
| 7                     | <i>acuH</i> | SPO0147                   | SL1157_0807                         |
| 8                     | <i>aldH</i> | SPO0097                   | SL1157_1245                         |
| 9                     | <i>mtoX</i> | SPOA0269                  | —                                   |

<sup>a</sup>: Locus tags for the pathways detailed in **figure 1** are shown. Multiple locus tags indicate the presence of additional homologues. “—” indicates the absence of a gene homologue.

<sup>b</sup>: Numbers reference the reactions depicted in **figure 1**.
