# Supplementary material for: Dimethylsulfoniopropionate Sulfur and Methyl Carbon Assimilation in Ruegeria Species
Source: PubMed Central journal article supplement (PMC7157515; doi:10.1128/mbio.00329-20), 2020-03-24
Supplement: mBio.00329-20-st002.pdf [file mBio.00329-20-st002.pdf]

## Dimethylsulfoniopropionate sulfur and methyl carbon assimilation in *Ruegeria* species

Joseph S. Wirth, Tao Wang, Qiuyuan Huang, Robert H. White, and William B. Whitman

### Supplementary Material

**Table S2. Comparison of the relative abundances of mass shifts for *R. pomeroyi* and *R. lacuscaerulensis* chemostat cultures.**

| Compound   | Mass Shift | <i>R. pomeroyi</i> <sup>a</sup> | <i>R. lacuscaerulensis</i> <sup>a</sup> |
|------------|------------|---------------------------------|-----------------------------------------|
| Methionine | 0          | 0.418 ± 0.002                   | 0.428 ± 0.044                           |
|            | 1          | 0.075 ± 0.004                   | 0.070 ± 0.010                           |
|            | 2          | 0.258 ± 0.010                   | 0.232 ± 0.009                           |
|            | 3          | 0.249 ± 0.007                   | 0.260 ± 0.018                           |
| Cysteine   | 0          | 0.416 ± 0.025                   | 0.428 ± 0.033                           |
|            | 1          | 0.099 ± 0.035                   | 0.041 ± 0.025                           |
|            | 2          | 0.376 ± 0.012                   | 0.478 ± 0.056                           |
|            | 3          | 0.106 ± 0.021                   | 0.053 ± 0.007                           |

<sup>a</sup>: Values indicate the mean ( $n = 3$ ) relative abundance of each mass shift after five days in chemostat following the addition of 50  $\mu\text{M}$  DMSP ( $50.18 \pm 2.24\%$  enriched with [ $^{13}\text{C}$ ][ $^{34}\text{S}$ ]DMSP) to the chemostat reservoir. Error indicates the 95% confidence interval.
