# Supplementary material for: Dimethylsulfoniopropionate Sulfur and Methyl Carbon Assimilation in Ruegeria Species
Source: PubMed Central journal article supplement (PMC7157515; doi:10.1128/mbio.00329-20), 2020-03-24
Supplement: mBio.00329-20-st003.pdf [file mBio.00329-20-st003.pdf]

## Dimethylsulfoniopropionate sulfur and methyl carbon assimilation in *Ruegeria* species

Joseph S. Wirth, Tao Wang, Qiuyuan Huang, Robert H. White, and William B. Whitman

### Supplementary Material

**Table S3. Comparison of the isotopomer enrichments for *R. pomeroyi* and *R. lacuscaerulensis* chemostat cultures.**

| Compound   | Isotopomer                      | <i>R. pomeroyi</i> <sup>a</sup> | <i>R. lacuscaerulensis</i> <sup>a</sup> |
|------------|---------------------------------|---------------------------------|-----------------------------------------|
| Methionine | <sup>12</sup> C <sup>32</sup> S | 47.8 ± 0.2                      | 49.0 ± 5.2                              |
|            | <sup>13</sup> C <sup>32</sup> S | 3.9 ± 0.5                       | 3.2 ± 1.7                               |
|            | <sup>12</sup> C <sup>34</sup> S | 25.7 ± 1.1                      | 22.9 ± 0.9                              |
|            | <sup>13</sup> C <sup>34</sup> S | 22.7 ± 0.8                      | 25.4 ± 4.6                              |
|            | total <sup>13</sup> C           | 26.5 ± 1.0                      | 28.5 ± 6.4                              |
|            | total <sup>34</sup> S           | 48.3 ± 0.6                      | 48.3 ± 4.5                              |
| Cysteine   | <sup>12</sup> C <sup>32</sup> S | 47.0 ± 2.9                      | 48.4 ± 3.8                              |
|            | <sup>13</sup> C <sup>32</sup> S | 7.1 ± 4.2                       | 0.5 ± 1.7                               |
|            | <sup>12</sup> C <sup>34</sup> S | 38.4 ± 1.7                      | 49.9 ± 6.5                              |
|            | <sup>13</sup> C <sup>34</sup> S | 7.8 ± 2.9                       | 1.4 ± 0.8                               |
|            | total <sup>13</sup> C           | 14.9 ± 4.2                      | 1.9 ± 2.3                               |
|            | total <sup>34</sup> S           | 46.2 ± 3.6                      | 51.3 ± 6.2                              |

<sup>a</sup>: Values indicate the mean ( $n = 3$ ) percent enrichment of each isotopomer after five days in chemostat following the addition of 50  $\mu$ M DMSP ( $50.18 \pm 2.24$  % enriched with [<sup>13</sup>C][<sup>34</sup>S]DMSP) to the chemostat reservoir and were calculated as described in the Materials and Methods. Error indicates the 95 % confidence intervals.
