# Supplementary material for: Dimethylsulfoniopropionate Sulfur and Methyl Carbon Assimilation in Ruegeria Species
Source: PubMed Central journal article supplement (PMC7157515; doi:10.1128/mbio.00329-20), 2020-03-24
Supplement: mBio.00329-20-st004.pdf [file mBio.00329-20-st004.pdf]

## Dimethylsulfoniopropionate sulfur and methyl carbon assimilation in *Ruegeria* species

Joseph S. Wirth, Tao Wang, Qiuyuan Huang, Robert H. White, and William B. Whitman

### Supplementary Material

**Table S4. Comparison of the enriched pools and pathway fluxes for *R. pomeroyi* and *R. lacuscaerulensis* chemostat cultures.**

|                                                  | <i>R. pomeroyi</i> <sup>a</sup> | <i>R. lacuscaerulensis</i> <sup>a</sup> |
|--------------------------------------------------|---------------------------------|-----------------------------------------|
| <sup>13</sup> CH <sub>3</sub> -THF               | 11.4 ± 1.6                      | 12.6 ± 6.3                              |
| [ <sup>13</sup> C]serine                         | 14.8 ± 4.2                      | 1.9 ± 2.3                               |
| <sup>34</sup> S <sup>2-</sup>                    | 46.0 ± 3.2                      | 51.2 ± 5.7                              |
| [ <sup>13</sup> C][ <sup>34</sup> S]methanethiol | 52.3 ± 1.9                      | 45.3 ± 8.7                              |
| Reassembly pathway                               | 62.9 ± 1.8                      | 51.4 ± 3.4                              |
| Direct capture pathway                           | 37.1 ± 1.8                      | 48.6 ± 3.4                              |

<sup>a</sup>: Values indicate the mean ( $n = 3$ ) percentage of each pool that was enriched or the percentage of L-methionine synthesized via the respective pathway after five days in chemostat following the addition of 50  $\mu$ M DMSP ( $50.18 \pm 2.24$  % enriched with [<sup>13</sup>C][<sup>34</sup>S]DMSP) to the chemostat reservoir. Values were calculated as described in the Materials and Methods. Error indicates the 95 % confidence interval.
